# Supplementary material for: Spatially heterogenous dynamics in colloidal gels during syneresis
Source: Royal Society of Chemistry journal article supplement (doi:10.1039/d3sm00448a), 2023-01-01
Supplement: d3sm00448a1.pdf [file d3sm00448a1.pdf]

Cite this: DOI: 10.1039/xxxxxxxxxx

## Electronic Supplementary Information to: Unravelling Spatially Heterogeneous Dynamics in Colloidal Gels during Syneresis

Qimeng Wu, Jesse Buijs, Sanne de Groot, Hanne van der Kooi, Jasper van der Gucht and Thomas E. Kodger\*

### 1 Syneresis Movies of Colloidal Gels

Movie 1 = " $d_2$  maps of PS gel during syneresis,  $\tau=0.125$  s, colormap inferno. Left end of  $d_2$  maps represents the capillary wall. 2fps"

Movie 2 = " $d_2$  maps of PBA gel during syneresis,  $\tau=0.125$  s, colormap inferno. Left end of  $d_2$  maps represents the capillary wall. 2fps"

### 2 Noise Artefacts Check at the Gel Edge

Fast macroscopic movement of the syneresing colloidal gels is prone to induce too low intensity in the speckle images at the moving gel edge, resulting in high  $d_2$  noise artefacts. To check for this possible effect, a series of images with  $\Delta I = 1, 2, 5$  and  $8$  added to the speckle images for the PBA gel are shown in Fig. S1. Intensity fluctuations in properly illuminated areas are conserved but the fluctuations in poorly illuminated areas are less overestimated.

With increasing  $\Delta I$ , the high  $d_2$  stripe, indicating high mobility, at the sample moving edge vanishes and a stripe with low mobility, low  $d_2$  developed indicating that the high  $d_2$  is indeed related to noise artifacts. This may be related to incomplete randomization of photons in this area due to the fast macroscopic movement and the resulting thin edge. Therefore, all calculations and anal-

ysis in this work are carried out on speckle images with  $\Delta I = 5$ .

<sup>a</sup> Physical Chemistry and Soft Matter, Wageningen University and Research, Stippeneng 4, 6708 WE, Wageningen, The Netherlands . E-mail: thomas.kodger@wur.nl

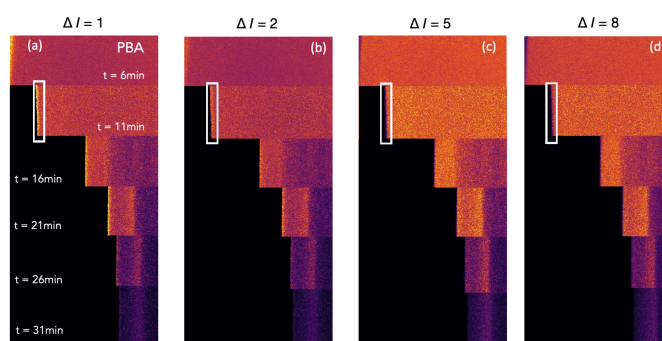

**Fig. S1** Time-lapse  $d_2$  maps of PBA gel,  $\tau=0.125$  s, calculated from  $\Delta I = 1, 2, 5$  and  $8$  to the speckle images, colormap inferno. Left end of  $d_2$  maps represents the capillary wall. Region of interest with low intensity at the moving edge of the gels is marked with white rectangles for  $t = 11$  min.
